# Supplementary material for: Prognostic value of lower bone mineral density in predicting adverse cardiovascular disease in Asian women
Source: HighWire-hosted journal article supplement (doi:10.1136/heartjnl-2020-318764), 2021-05-07
Supplement: heartjnl-2020-318764supp001_data_supplement.pdf [file heartjnl-2020-318764supp001_data_supplement.pdf]

## SUPPLEMENTAL FIGURES

Supplementary Figure 1. Study flow

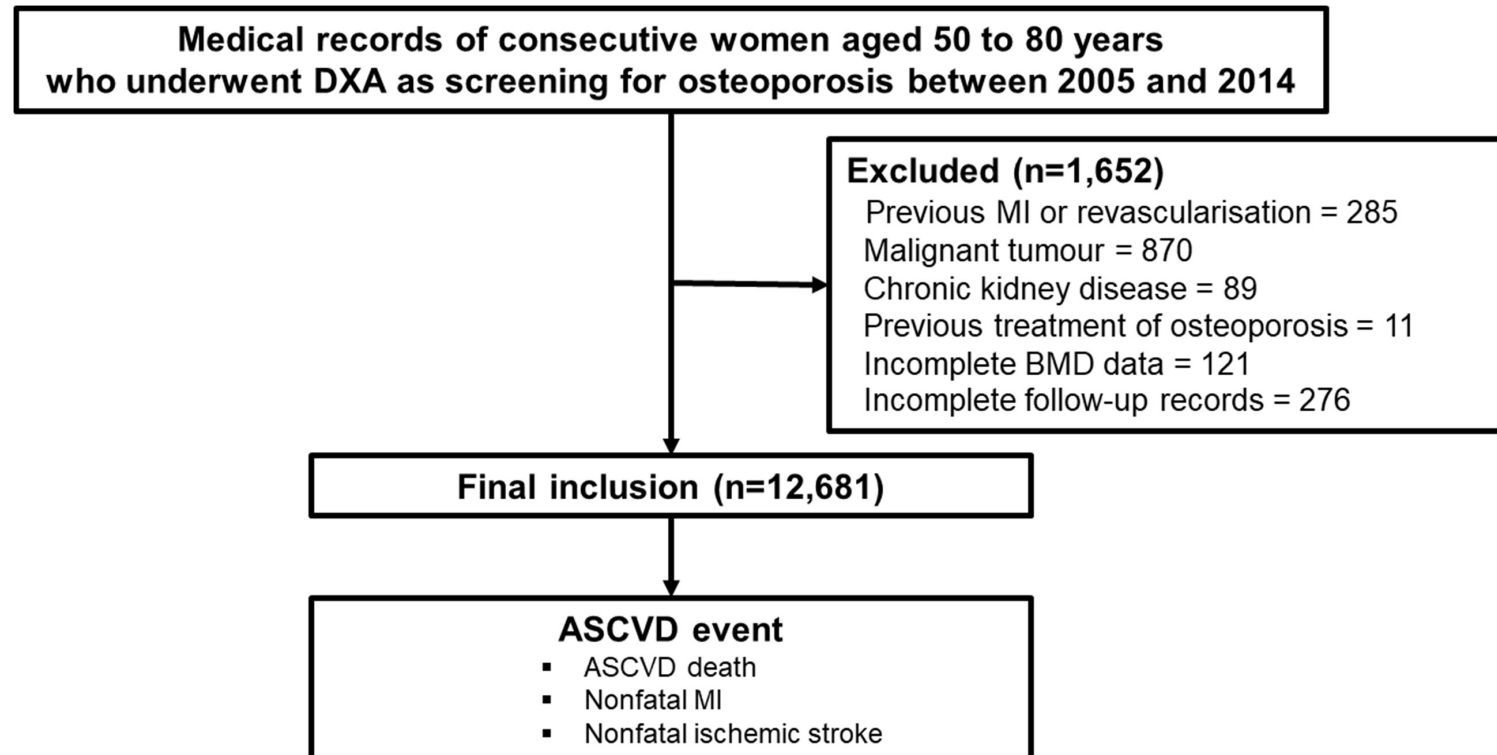

ASCVD = atherosclerotic cardiovascular disease, BMD = bone mineral density, DXA = dual-energy X-ray absorptiometry, MI = myocardial infarction

Supplementary Figure 2. Model calibration

|         |                                                                        | Brier score | Brier skill score |
|---------|------------------------------------------------------------------------|-------------|-------------------|
| Model 1 | Age                                                                    | 0.0327      | reference         |
| Model 2 | Model 1 + clinical risk factors                                        | 0.0318      | 0.0275            |
| Model 3 | Model 2 + BMD as a continuous variable                                 |             |                   |
|         | Lumbar BMD                                                             | 0.0319      | 0.0245            |
|         | Femur neck BMD                                                         | 0.0318      | 0.0275            |
|         | Total hip BMD                                                          | 0.0315      | 0.0367            |
| Model 4 | Model 2 + diagnosis of osteopenia or osteoporosis based on the T-score |             |                   |
|         | Lumbar T-score                                                         | 0.0315      | 0.0367            |
|         | Femur neck T-score                                                     | 0.0314      | 0.0398            |
|         | Total hip T-score                                                      | 0.0312      | 0.0459            |

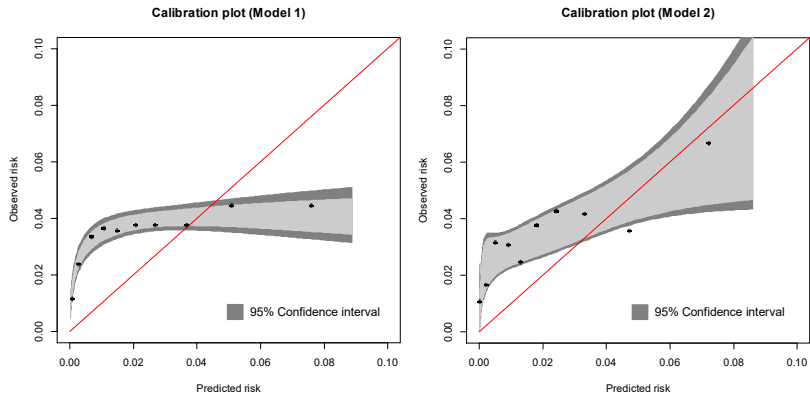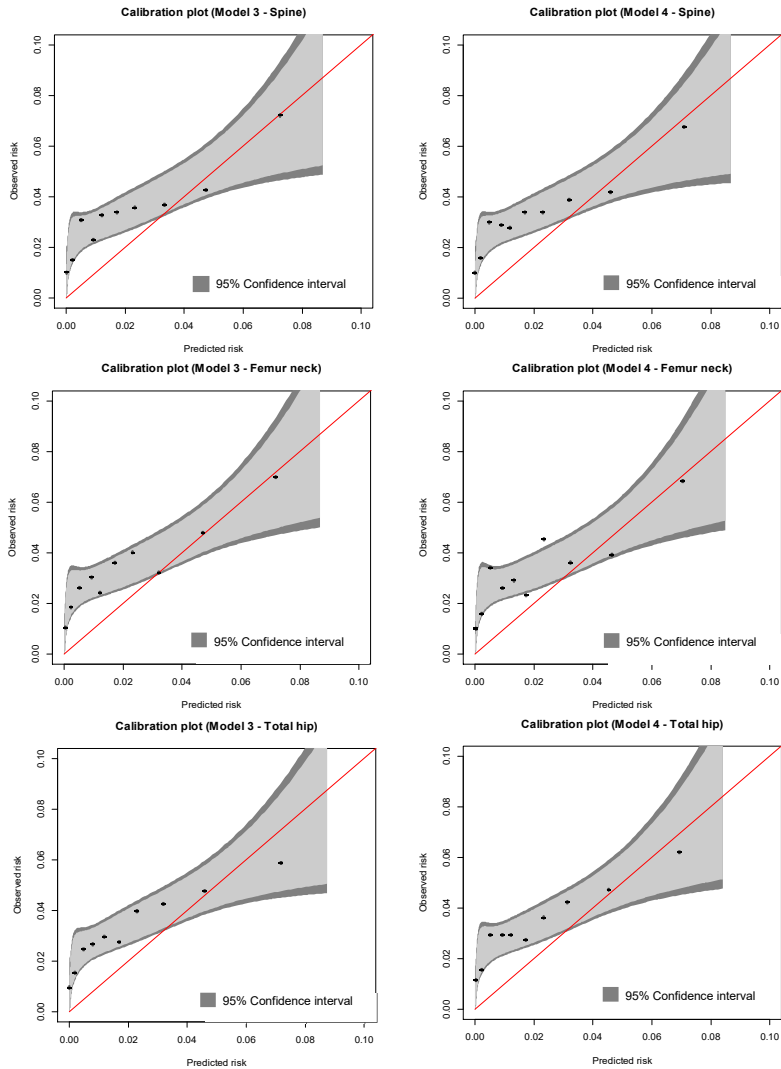

Calibration of each model was assessed by plotting predicted probabilities of ASCVD, by decile groups (black points), against observed probabilities with 95% confidence interval presented as calibration belt (dark grey zone). Additionally, the magnitude of the error in the predicted probabilities were summarized with Brier Score, where a model with a score of 0.0 is considered as perfectly skilled model.

SUPPLEMENTAL TABLES

Supplementary Table 1. Clinical risk factors according to a diagnosis of osteopenia or osteoporosis based on the lumbar, femur neck, total hip BMD

|                                   | Lumbar BMD          |                         |                           |        | Femur neck BMD      |                         |                         |        | Total hip BMD       |                         |                         |        |
|-----------------------------------|---------------------|-------------------------|---------------------------|--------|---------------------|-------------------------|-------------------------|--------|---------------------|-------------------------|-------------------------|--------|
|                                   | Normal<br>(n=5,660) | Osteopenia<br>(n=5,014) | Osteoporosis<br>(n=2,007) | P      | Normal<br>(n=5,837) | Osteopenia<br>(n=5,845) | Osteoporosis<br>(n=999) | P      | Normal<br>(n=7,229) | Osteopenia<br>(n=4,621) | Osteoporosis<br>(n=831) | P      |
| Age, mean (SD), years             | 60.1 (7.3)          | 64.0 (7.2)              | 68.4 (6.8)                | <0.001 | 59.0 (6.3)          | 65.5 (7.1)              | 71.7 (5.8)              | <0.001 | 60.0 (6.7)          | 66.0 (7.2)              | 72.0 (6.0)              | <0.001 |
| BMI, mean (SD), kg/m <sup>2</sup> | 24.6 (3.2)          | 24.0 (3.1)              | 22.9 (3.4)                | <0.001 | 24.3 (3.1)          | 24.1 (3.2)              | 22.7 (3.8)              | <0.001 | 24.5 (3.1)          | 23.8 (3.2)              | 22.2 (3.7)              | <0.001 |
| Current smoking, No. (%)          | 59 (1.0)            | 86 (1.7)                | 63 (3.1)                  | <0.001 | 63 (1.1)            | 94 (1.6)                | 51 (5.1)                | <0.001 | 78 (1.1)            | 88 (1.9)                | 42 (5.1)                | <0.001 |
| Hypertension, No. (%)             | 1,689 (29.8)        | 1,511 (30.1)            | 611 (30.4)                | 0.868  | 1,779 (30.1)        | 1,735 (29.7)            | 297 (29.7)              | 0.628  | 2,195 (30.4)        | 1,377 (29.8)            | 239 (28.8)              | 0.567  |
| Type 2 diabetes mellitus, No. (%) | 621 (11.0)          | 532 (10.6)              | 183 (9.1)                 | 0.066  | 592 (10.1)          | 630 (10.8)              | 114 (11.4)              | 0.344  | 780 (10.8)          | 475 (10.3)              | 81 (9.7)                | 0.505  |
| Hyperlipidaemia, No. (%)          | 2,130 (37.6)        | 1,728 (34.5)            | 512 (25.5)                | <0.001 | 2,253 (38.6)        | 1,880 (32.2)            | 237 (23.7)              | <0.001 | 2,746 (38.0)        | 1,437 (31.1)            | 187 (22.5)              | <0.001 |
| Previous fracture, No. (%)        | 143 (2.5)           | 202 (4.0)               | 136 (6.8)                 | <0.001 | 116 (2.0)           | 258 (4.4)               | 107 (10.7)              | <0.001 | 162 (2.2)           | 227 (4.9)               | 92 (11.1)               | <0.001 |
| 10-year ASCVD risk, mean (SD)     | 7.8 (5.9)           | 10.1 (6.6)              | 13.2 (7.5)                | <0.001 | 6.9 (4.7)           | 11.1 (6.9)              | 16.4 (7.9)              | <0.001 | 7.5 (5.2)           | 11.5 (7.1)              | 16.5 (7.9)              | <0.001 |
| <7.5%, No. (%)                    | 3,534 (62.4)        | 2,168 (43.2)            | 472 (23.5)                | <0.001 | 3,940 (67.5)        | 2,139 (36.6)            | 95 (9.5)                | <0.001 | 4,516 (62.5)        | 1,570 (34.0)            | 88 (10.6)               | <0.001 |
| ≥7.5%, No. (%)                    | 2,126 (37.6)        | 2,846 (56.8)            | 1,535 (76.5)              |        | 1,897 (32.5)        | 3,706 (63.4)            | 904 (90.5)              |        | 2,713 (37.5)        | 3,051 (66.0)            | 743 (89.4)              |        |

Osteopenia is defined as a BMD T-score between −1.0 and −2.5, and osteoporosis is defined as a T-score below −2.5  
ASCVD, atherosclerotic cardiovascular disease; BMD, bone mineral density; BMI, body mass index; SD, standard deviation

Supplementary Table 2. ASCVD risk according to clinical risk factors

| Risk factors                           | Age adjusted<br>HR (95% CI) | p-<br>value | Age and other<br>clinical risk<br>factors*<br>adjusted<br>HR (95% CI) | p-value | Age, other<br>clinical risk<br>factors*, and<br>lumbar BMD<br>adjusted<br>HR (95% CI) | p-<br>value | Age, other<br>clinical risk<br>factors*, and<br>femur neck<br>BMD adjusted<br>HR (95% CI) | p-value | Age, other<br>clinical risk<br>factors*, and<br>total hip BMD<br>adjusted<br>HR (95% CI) | p-value |
|----------------------------------------|-----------------------------|-------------|-----------------------------------------------------------------------|---------|---------------------------------------------------------------------------------------|-------------|-------------------------------------------------------------------------------------------|---------|------------------------------------------------------------------------------------------|---------|
| Age (per 5-year increase)              | 1.86 (1.75-1.99)            | <0.001      | 1.82 (1.70-1.94)                                                      | <0.001  | 1.74 (1.62-1.87)                                                                      | <0.001      | 1.66 (1.53-1.79)                                                                          | <0.001  | 1.61 (1.49-1.74)                                                                         | <0.001  |
| BMI (per 1 kg/m <sup>2</sup> increase) | 0.97 (0.95-1.00)            | 0.058       | 0.96 (0.94-0.99)                                                      | 0.007   | 0.98 (0.95-1.01)                                                                      | 0.123       | 0.98 (0.95-1.00)                                                                          | 0.078   | 0.99 (0.96-1.02)                                                                         | 0.503   |
| Current smoking                        | 3.01 (2.05-4.42)            | <0.001      | 2.88 (1.96-4.24)                                                      | <0.001  | 2.77 (1.88-4.08)                                                                      | <0.001      | 2.69 (1.83-3.97)                                                                          | <0.001  | 2.64 (1.79-3.89)                                                                         | <0.001  |
| Hypertension                           | 1.08 (0.89-1.31)            | 0.457       | 1.04 (0.85-1.26)                                                      | 0.711   | 1.04 (0.86-1.27)                                                                      | 0.680       | 1.05 (0.86-1.27)                                                                          | 0.653   | 1.05 (0.86-1.28)                                                                         | 0.624   |
| Type 2 diabetes mellitus               | 2.64 (2.15-3.23)            | <0.001      | 2.69 (2.18-3.32)                                                      | <0.001  | 2.77 (2.24-3.43)                                                                      | <0.001      | 2.73 (2.21-3.38)                                                                          | <0.001  | 2.80 (2.26-3.46)                                                                         | <0.001  |
| Hyperlipidaemia                        | 1.26 (1.05-1.51)            | 0.014       | 1.05 (0.87-1.27)                                                      | 0.625   | 1.08 (0.89-1.31)                                                                      | 0.431       | 1.08 (0.90-1.31)                                                                          | 0.407   | 1.11 (0.91-1.34)                                                                         | 0.294   |
| Previous fracture                      | 1.21 (0.88-1.65)            | 0.249       | 1.06 (0.77-1.46)                                                      | 0.710   | 1.02 (0.74-1.41)                                                                      | 0.884       | 0.99 (0.72-1.36)                                                                          | 0.953   | 0.96 (0.69-1.32)                                                                         | 0.782   |

\*Other clinical risk factors include body mass index, hypertension, type 2 diabetes mellitus, hyperlipidaemia, current smoking, and previous fracture.  
ASCVD, atherosclerotic cardiovascular disease; BMD, bone mineral density; BMI, body mass index; CI, confidence interval; HR, hazard ratio

**Supplementary Table 3. Competing-risks-adjusted clinical outcomes according to BMD values and a clinical diagnosis of osteopenia or osteoporosis**

| Risk factors                                                         | ASCVD                                  | p-value | ASCVD death                            | p-value |
|----------------------------------------------------------------------|----------------------------------------|---------|----------------------------------------|---------|
|                                                                      | Competing-risk-adjusted<br>HR (95% CI) |         | Competing-risk-adjusted<br>HR (95% CI) |         |
| <i>BMD as a continuous variable</i>                                  |                                        |         |                                        |         |
| Lumbar BMD (per 1-SD decrease)                                       | 1.14 (1.05-1.24)                       | 0.001   | 1.22 (1.09-1.37)                       | <0.001  |
| Femur neck BMD (per 1-SD decrease)                                   | 1.25 (1.09-1.44)                       | 0.002   | 1.51 (1.21-1.88)                       | <0.001  |
| Total hip BMD (per 1-SD decrease)                                    | 1.33 (1.19-1.49)                       | <0.001  | 1.63 (1.39-1.92)                       | <0.001  |
| <i>Diagnoses of osteopenia and osteoporosis based on the T-score</i> |                                        |         |                                        |         |
| <b>Lumbar T-score</b>                                                |                                        |         |                                        |         |
| Normal                                                               | 1 (reference)                          |         | 1 (reference)                          |         |
| Osteopenia                                                           | 0.99 (0.79-1.24)                       | 0.900   | 0.99 (0.70-1.39)                       | 0.950   |
| Osteoporosis                                                         | 1.63 (1.27-2.10)                       | <0.001  | 1.96 (1.39-2.77)                       | <0.001  |
| <b>Femur neck T-score</b>                                            |                                        |         |                                        |         |
| Normal                                                               | 1 (reference)                          |         | 1 (reference)                          |         |
| Osteopenia                                                           | 1.27 (0.99-1.61)                       | 0.057   | 1.52 (1.01-2.28)                       | 0.044   |
| Osteoporosis                                                         | 2.10 (1.53-2.88)                       | <0.001  | 2.72 (1.69-4.39)                       | <0.001  |
| <b>Total hip T-score</b>                                             |                                        |         |                                        |         |
| Normal                                                               | 1 (reference)                          |         | 1 (reference)                          |         |
| Osteopenia                                                           | 1.37 (1.10-1.72)                       | 0.006   | 2.00 (1.38-2.88)                       | <0.001  |
| Osteoporosis                                                         | 2.64 (1.94-3.59)                       | <0.001  | 4.39 (2.80-6.88)                       | <0.001  |
| <b>Combined T-score</b>                                              |                                        |         |                                        |         |
| Normal                                                               | 1 (reference)                          |         | 1 (reference)                          |         |
| Osteopenia                                                           | 1.01 (0.76-1.33)                       | 0.960   | 1.05 (0.66-1.68)                       | 0.820   |
| Osteoporosis                                                         | 1.74 (1.27-2.39)                       | <0.001  | 2.09 (1.28-3.42)                       | 0.003   |

Osteopenia was defined as a BMD T-score between  $-1.0$  and  $-2.5$ , and osteoporosis was defined as a T-score below  $-2.5$ . Single-site BMD-related values (either BMD or a diagnosis of osteopenia/osteoporosis) of the indicated skeletal site were included in the Cox regression model with other covariates (age, body mass index, hypertension, type 2 diabetes mellitus, hyperlipidaemia, current smoking, and previous fracture)

ASCVD, atherosclerotic cardiovascular disease; BMD, bone mineral density; CI, confidence interval; HR, hazard ratio; SD, standard deviation

**Supplementary Table 4. Sensitivity analysis for the risk of ASCVD and ASCVD death according to BMD values and a clinical diagnosis of osteopenia or osteoporosis after excluding censored subjects before the median follow-up period**

| Risk factors                                                                | ASCVD                         |                     | ASCVD death                   |                     |
|-----------------------------------------------------------------------------|-------------------------------|---------------------|-------------------------------|---------------------|
|                                                                             | Fully adjusted HR<br>(95% CI) | p-value             | Fully adjusted HR<br>(95% CI) | p-value             |
| <b><i>BMD as a continuous variable</i></b>                                  |                               |                     |                               |                     |
| Lumbar BMD (per 1-SD decrease)                                              | 1.17 (1.09-1.26)              | <0.001              | 1.26 (1.13-1.40)              | <0.001              |
| Femur neck BMD (per 1-SD decrease)                                          | 1.31 (1.17-1.46)              | <0.001              | 1.56 (1.33-1.83)              | <0.001              |
| Total hip BMD (per 1-SD decrease)                                           | 1.40 (1.27-1.55)              | <0.001              | 1.72 (1.50-1.98)              | <0.001              |
| <b><i>Diagnoses of osteopenia and osteoporosis based on the T-score</i></b> |                               |                     |                               |                     |
| <b>Lumbar T-score</b>                                                       | <b>Number of women</b>        | <b>Event, n (%)</b> |                               | <b>Event, n (%)</b> |
| Normal                                                                      | 3,123                         | 144 (4.6)           | 1 (reference)                 | 58 (1.9)            |
| Osteopenia                                                                  | 2,567                         | 171 (6.7)           | 1.00 (0.80-1.26)              | 77 (3.0)            |
| Osteoporosis                                                                | 894                           | 153 (17.1)          | 1.77 (1.38-2.27)              | 102 (11.4)          |
| <b>Femur neck T-score</b>                                                   |                               |                     |                               |                     |
| Normal                                                                      | 3,217                         | 109 (3.4)           | 1 (reference)                 | 35 (1.1)            |
| Osteopenia                                                                  | 2,906                         | 245 (8.4)           | 1.30 (1.02-1.66)              | 123 (4.2)           |
| Osteoporosis                                                                | 461                           | 114 (24.7)          | 2.34 (1.71-3.19)              | 79 (17.1)           |
| <b>Total hip T-score</b>                                                    |                               |                     |                               |                     |
| Normal                                                                      | 3,927                         | 150 (3.8)           | 1 (reference)                 | 45 (1.1)            |
| Osteopenia                                                                  | 2,283                         | 210 (9.2)           | 1.41 (1.12-1.77)              | 112 (4.9)           |
| Osteoporosis                                                                | 374                           | 108 (28.9)          | 3.18 (2.36-4.28)              | 80 (21.4)           |
| <b>Combined T-score</b>                                                     |                               |                     |                               |                     |
| Normal                                                                      | 2,221                         | 73 (3.3)            | 1 (reference)                 | 24 (1.1)            |
| Osteopenia                                                                  | 3,243                         | 199 (6.1)           | 0.99 (0.75-1.32)              | 87 (2.7)            |
| Osteoporosis                                                                | 1,120                         | 196 (17.5)          | 1.87 (1.27-2.55)              | 126 (11.3)          |

Osteopenia was defined as a BMD T-score between  $-1.0$  and  $-2.5$ , and osteoporosis was defined as a T-score below  $-2.5$ . Single-site BMD-related values (either BMD or a diagnosis of osteopenia/osteoporosis) of the indicated skeletal site were included in the Cox regression model with other covariates (age, body mass index, hypertension, type 2 diabetes mellitus, hyperlipidaemia, current smoking, and previous fracture)

ASCVD, atherosclerotic cardiovascular disease; BMD, bone mineral density; CI, confidence interval; HR, hazard ratio; SD, standard deviation

**Supplementary Table 5. Risk for ASCVD and ASCVD death according to BMD values and a clinical diagnosis of osteopenia or osteoporosis among a low-risk population with age <70 years and no risk factors**

| Risk factors                                                                | ASCVD                       |                     | ASCVD death                 |                     |
|-----------------------------------------------------------------------------|-----------------------------|---------------------|-----------------------------|---------------------|
|                                                                             | Age adjusted HR<br>(95% CI) | p-value             | Age adjusted HR<br>(95% CI) | p-value             |
| <b><i>BMD as a continuous variable</i></b>                                  |                             |                     |                             |                     |
| Lumbar BMD (per 1-SD decrease)                                              | 1.07 (0.86-1.34)            | 0.550               | 1.44 (1.01-2.06)            | 0.044               |
| Femur neck BMD (per 1-SD decrease)                                          | 1.29 (0.92-1.82)            | 0.141               | 1.97 (1.16-3.35)            | 0.012               |
| Total hip BMD (per 1-SD decrease)                                           | 1.41 (1.04-1.90)            | 0.026               | 2.16 (1.40-3.34)            | <0.001              |
| <b><i>Diagnoses of osteopenia and osteoporosis based on the T-score</i></b> |                             |                     |                             |                     |
| <b>Lumbar T-score</b>                                                       | <b>Number of women</b>      | <b>Event, n (%)</b> |                             | <b>Event, n (%)</b> |
| Normal                                                                      | 1,980                       | 21 (1.1)            | 1 (reference)               | 5 (0.3)             |
| Osteopenia                                                                  | 1,552                       | 15 (1.0)            | 0.71 (0.36-1.38)            | 8 (0.5)             |
| Osteoporosis                                                                | 451                         | 13 (2.9)            | 1.80 (0.87-3.74)            | 10 (2.2)            |
| <b>Femur neck T-score</b>                                                   |                             |                     |                             |                     |
| Normal                                                                      | 2,590                       | 17 (0.8)            | 1 (reference)               | 4 (0.2)             |
| Osteopenia                                                                  | 1,719                       | 26 (1.5)            | 1.36 (0.71-2.60)            | 15 (0.9)            |
| Osteoporosis                                                                | 119                         | 6 (5.0)             | 3.26 (1.20-8.84)            | 4 (3.4)             |
| <b>Total hip T-score</b>                                                    |                             |                     |                             |                     |
| Normal                                                                      | 2,590                       | 23 (0.9)            | 1 (reference)               | 6 (0.2)             |
| Osteopenia                                                                  | 1,295                       | 20 (1.5)            | 1.32 (0.71-2.45)            | 13 (1.0)            |
| Osteoporosis                                                                | 98                          | 6 (6.1)             | 3.78 (1.48-9.67)            | 4 (4.1)             |
| <b>Combined T-score</b>                                                     |                             |                     |                             |                     |
| Normal                                                                      | 1,505                       | 13 (0.9)            | 1 (reference)               | 2 (0.1)             |
| Osteopenia                                                                  | 1,961                       | 21 (1.1)            | 0.87 (0.43-1.80)            | 10 (0.5)            |
| Osteoporosis                                                                | 517                         | 15 (2.9)            | 2.02 (0.90-4.52)            | 11 (2.1)            |

Osteopenia was defined as a BMD T-score between −1.0 and −2.5, and osteoporosis was defined as a T-score below −2.5. Single-site BMD-related values (either BMD or a diagnosis of osteopenia/osteoporosis) of the indicated skeletal site were included in the Cox regression model with age.

ASCVD, atherosclerotic cardiovascular disease; BMD, bone mineral density; CI, confidence interval; HR, hazard ratio; SD, standard deviation
